# Supplementary material for: Enhanced charge extraction of polymer solar cell by solution-processable gold nanoparticles
Source: Royal Society of Chemistry journal article supplement (doi:10.1039/c3tc30956h), 2013-07-01
Supplement: c3tc30956h.pdf [file c3tc30956h.pdf]

## Supporting Information

### Enhanced charge extraction of Polymer Solar Cell by Solution-Processable Gold Nanoparticles

Si Yun Khoo<sup>a,b</sup>, Hongbin Yang<sup>a</sup>, Ziming He<sup>a</sup>, Jianwei Miao<sup>a</sup>, Kam Chew Leong<sup>b</sup>,  
Chang Ming Li<sup>c\*</sup>, Timothy Thatt Yang Tan<sup>a\*</sup>

<sup>a</sup> School of Chemical and Biomedical Engineering, Nanyang Technological University, 70 Nanyang Drive, Singapore 637459.

<sup>b</sup> GlobalFoundries Singapore Pte. Ltd., 60 Woodlands Industrial Park D, Street 2, Singapore 738406, Singapore.

<sup>c</sup> Institute for Clean Energy and Advanced Materials, Southwest University, Chongqing 400715, China.

- To whom correspondence should be addressed. Email: tytan@ntu.edu.sg, Tel: (+65) 6316 8829, Fax: (+65) 6794 7553 (TTYT). Email: ecml@swu.edu.cn (CML)

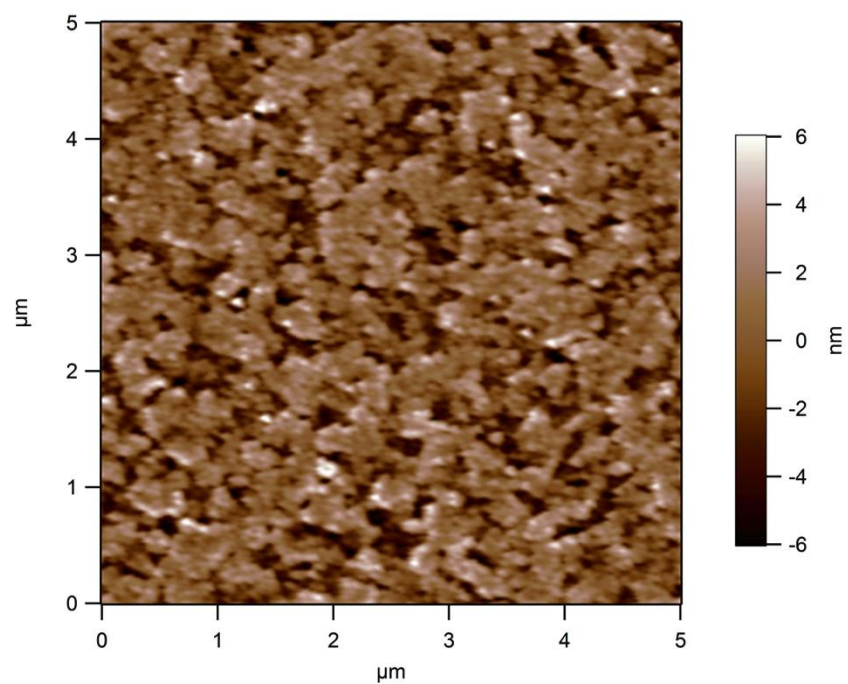

**Figure S 1:** AFM height topography of blank ITO substrate.

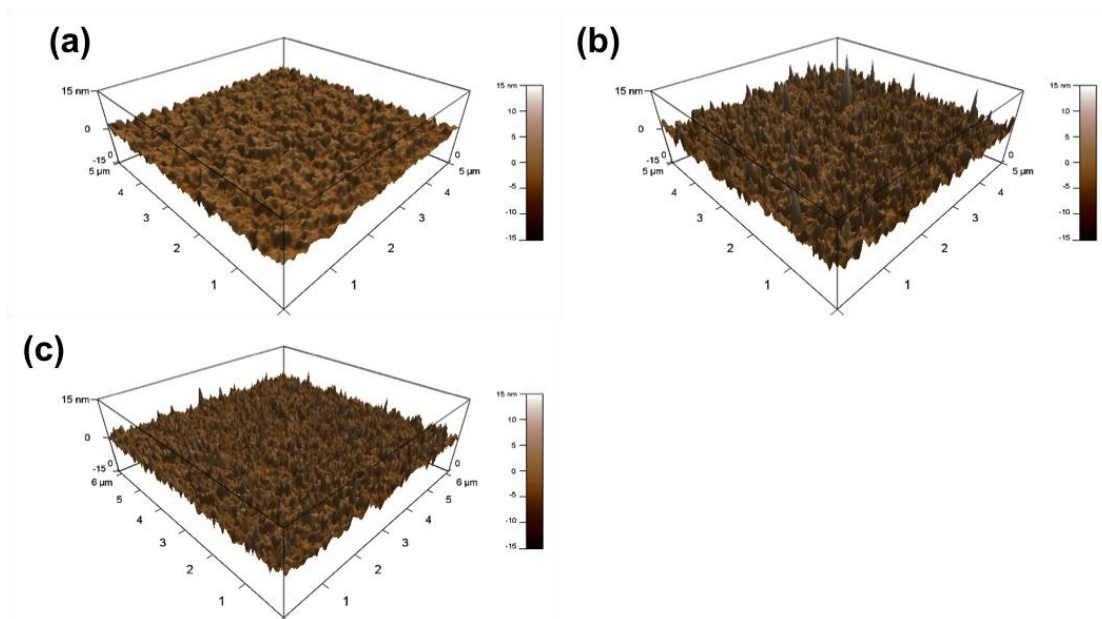

**Figure S 2:** 3D AFM topography images of (a) V<sub>2</sub>O<sub>5</sub>, (b) Au-NP/V<sub>2</sub>O<sub>5</sub>, (c) Au-NP:PSS/V<sub>2</sub>O<sub>5</sub> on ITO substrate.

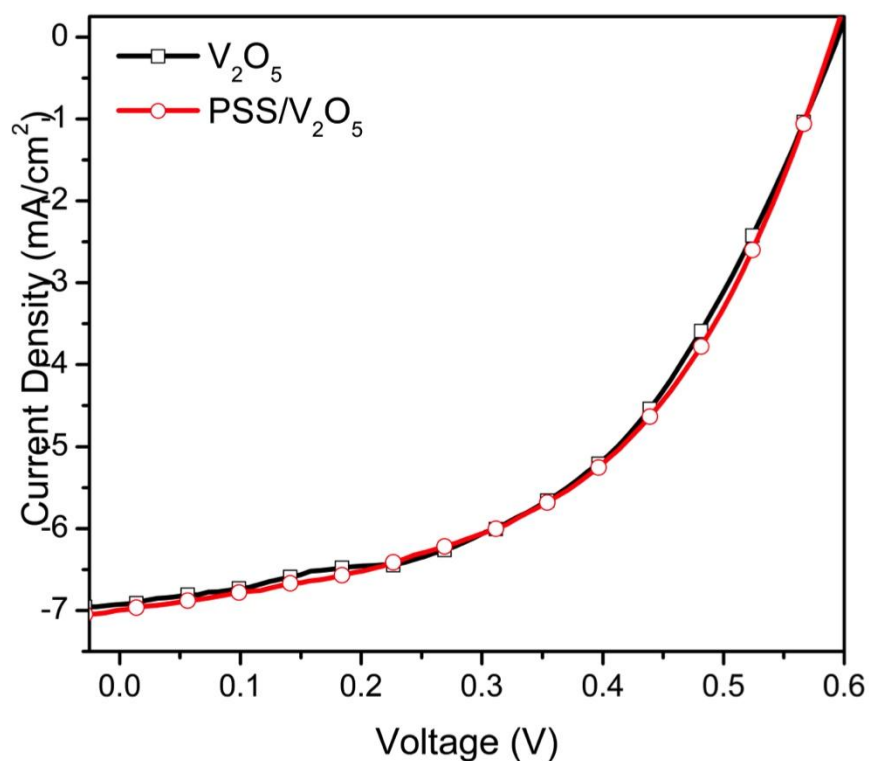

**Figure S 3:** The effect of insertion of PSS between  $V_2O_5$  and ITO substrate on the current-voltage characteristics of polymer solar cells.

**Table S 1:** Summary of performance parameters of P3HT:PC<sub>61</sub>BM solar cells fabricated by varying the component in buffer layer.

| Buffer Layer  | $V_{oc}$ (V) | $J_{sc}$ (mA/cm <sup>2</sup> ) | PCE (%) | FF (%) |
|---------------|--------------|--------------------------------|---------|--------|
| $V_2O_5$      | 0.596        | 7.02                           | 2.11    | 50.5   |
| PSS/ $V_2O_5$ | 0.592        | 7.00                           | 2.13    | 51.4   |
